# Supplementary material
Source: PubMed Central journal article supplement (PMC1478197)
Supplement: 7601146s2.pdf [file 7601146s2.pdf]

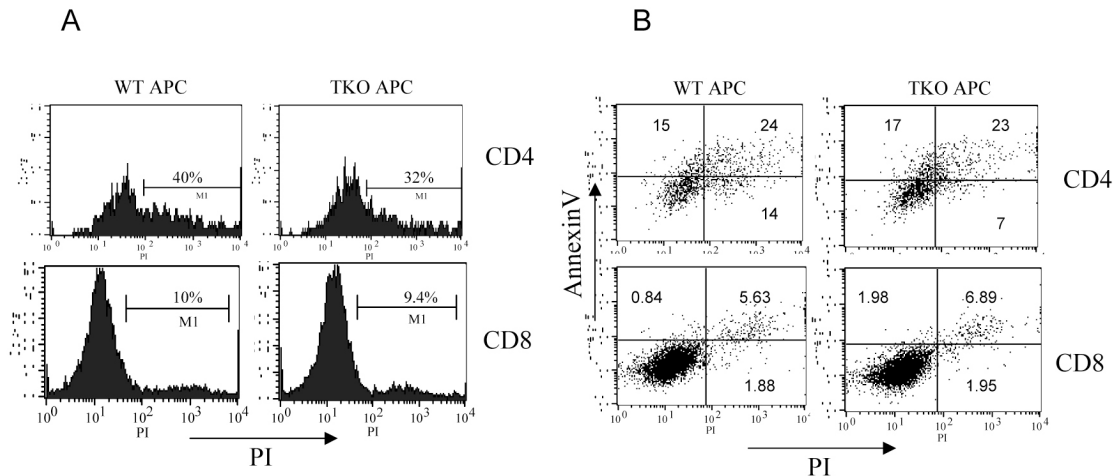

**Supplementary Figure 1.** Analysis of T cell apoptosis. (A) OT-II (CD4) or OT-I (CD8) T cells were activated with Ova or SIINFELK peptide, respectively and irradiated B7/B7h<sup>+/+</sup> (WT) or B7/B7h<sup>-/-</sup> (TKO) APC for 4 or 7 days. Cells were stained with V $\alpha$ 2-PE antibody and PI, and analyzed by FACS. Histograms represent PI intensity of V $\alpha$ 2<sup>+</sup> populations. (B) OT-II or OT-I cells were activated as in (A) for 4 or 7 days. Differentiated cells were restimulated with anti-CD3 for 4 hours and stained with V $\alpha$ 2-PE antibody and AnnexinV/PI for FACS analysis.
