# Supplementary material
Source: PubMed Central journal article supplement (PMC1478197)
Supplement: 7601146s3.pdf [file 7601146s3.pdf]

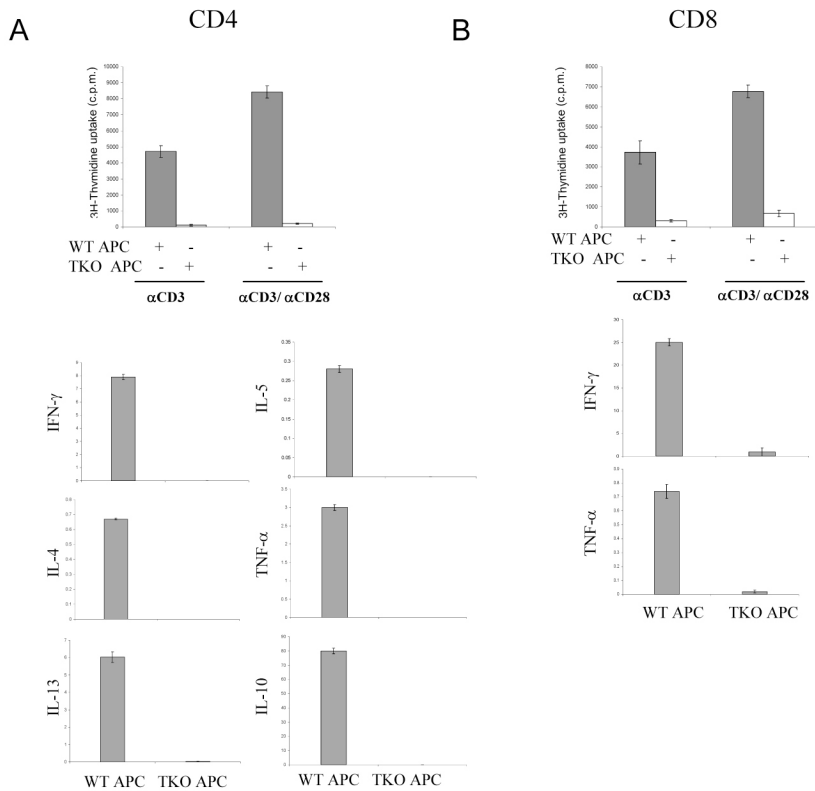

**Supplementary Figure 2.** T cell activation and differentiation in the absence of CD28 and ICOS costimulation. (A) OT-II cells were activated with Ova peptide and irradiated B7/B7h<sup>+/+</sup> (WT) or B7/B7h<sup>-/-</sup> (TKO) APC. 4 days later, differentiated T cells were restimulated with anti-CD3 or anti-CD3/anti-CD28 for 24 hours. Proliferation was assayed 24 hours after treatment by adding [<sup>3</sup>H]-thymidine to the culture for the last 8 hours. Effector cytokine production was measured by ELISA. All cytokines are at ng/ml. (B) OT-I cells were activated with SIINFEKL peptide and irradiated B7/B7h<sup>+/+</sup> (WT) or B7/B7h<sup>-/-</sup> (TKO) APC for 7 days. 7 days later, differentiated T cells were restimulated with anti-CD3 or anti-CD3/anti-CD28 for 24 hours. Proliferation was assayed 24 hours after treatment by adding [<sup>3</sup>H]-thymidine to the culture for the last 8 hours. Effector cytokine production was measured by ELISA. All cytokines are at ng/ml.
