# Supplementary material
Source: PubMed Central journal article supplement (PMC1478197)
Supplement: 7601146s4.pdf [file 7601146s4.pdf]

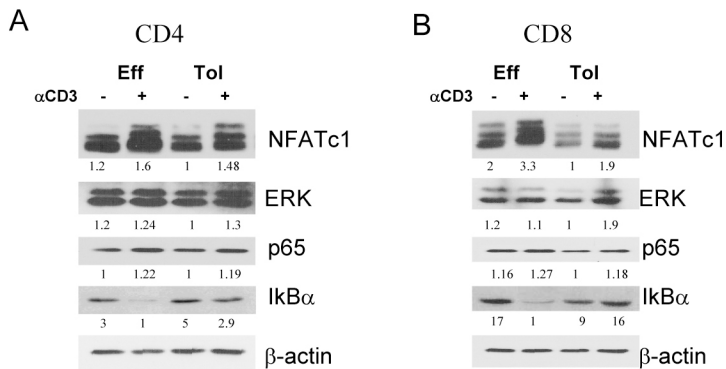

**Supplementary Figure 3.** TcR signal transduction in effector and tolerant T cells. (A, B) Effector (Eff) and tolerant (Tol) CD4 cells were generated as described in Supplementary Figure 2A and CD8 cells as in Supplementary Figure 2B. These cells were restimulated with anti-CD3 for 30 min and cytoplasmic fractions from nonrestimulated and restimulated cells were probed with NFATc1, ERK, p65, Ikb $\alpha$  antibodies.  $\beta$ -actin was used as loading control. Relative western blotting signals were induced.
