# Supplementary material
Source: PubMed Central journal article supplement (PMC1478197)
Supplement: 7601146s5.pdf [file 7601146s5.pdf]

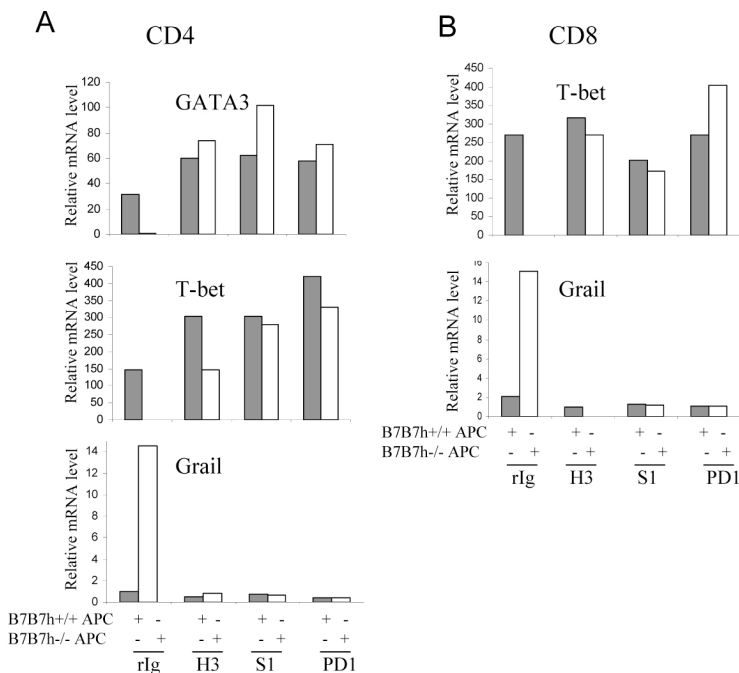

**Supplementary Figure 4.** Regulation of T-cell transcriptional factor expression by costimulatory molecules. OT-II (A) or OT-I (B) cells were treated with Ova or SIINFEKL peptide, respectively in the presence of irradiated wild-type or B7<sup>-/-</sup>B7h<sup>-/-</sup> APC with a control rat IgG or a blocking antibody to B7S1 (S1) or B7H3 (H3) or PD1. Restimulated OT-II T cells were analyzed for GATA-3, T-bet, Grail mRNA expression and OT-I T cells for T-bet and Grail mRNA expression by real-time PCR. The relative expression of each target gene was determined by normalizing it to GAPDH expression.
