# Supplementary material
Source: PubMed Central journal article supplement (PMC1478197)
Supplement: 7601146s6.pdf [file 7601146s6.pdf]

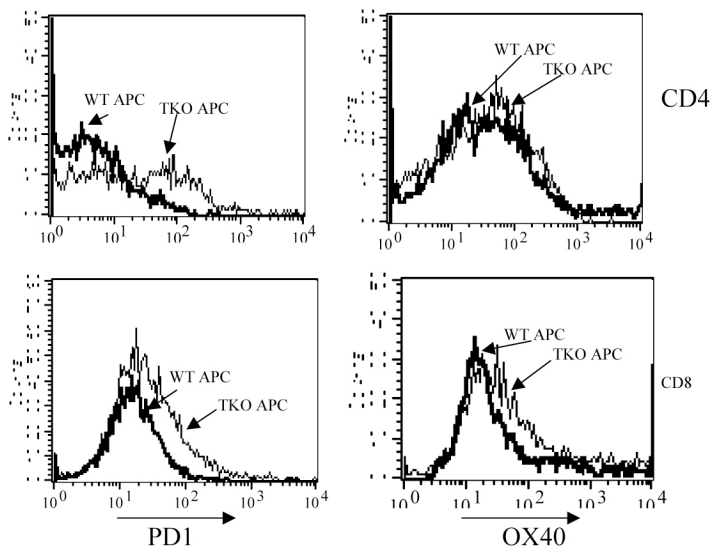

**Supplementary Figure 5.** Expression of PD1 and OX-40 on effector and tolerant T cells. OT-II or OT-I cells were activated with Ova or SIINFEKL peptide, respectively, and irradiated B7/B7h<sup>+/+</sup> (WT) or B7/B7h<sup>-/-</sup> (TKO) APC for 4 or 7 days. Differentiated cells were restimulated with anti-CD3 and stained with V $\alpha$ 2-FITC and PD-1-PE or OX-40-PE antibodies for FACS analysis. Histograms represent PD-1 or OX-40 intensity of V $\alpha$ 2<sup>+</sup> populations.
