# Supplementary material
Source: PubMed Central journal article supplement (PMC1478197)
Supplement: 7601146s7.pdf [file 7601146s7.pdf]

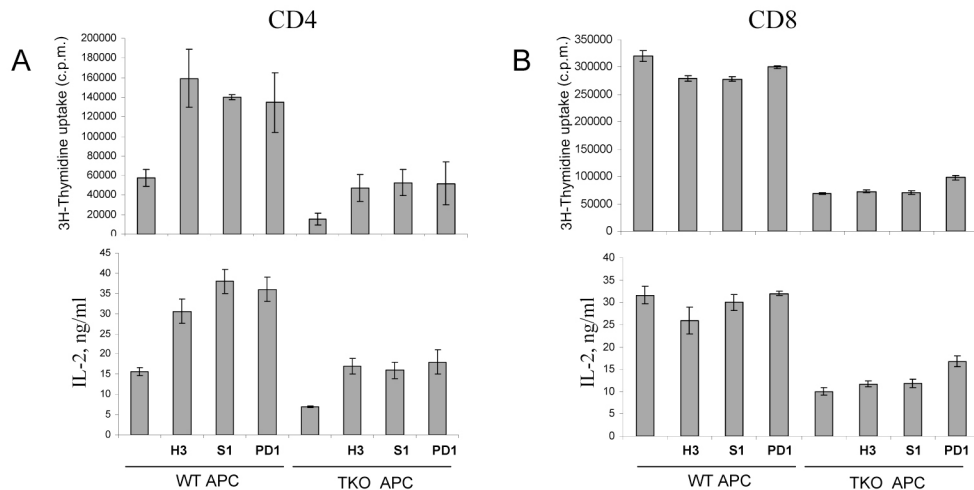

**Supplementary Figure 6.** Regulation of T cell activation by negative costimulatory molecules. OT-II (A) or OT-I (B) cells were treated with Ova or SIINFEKL peptide, respectively, in the presence of irradiated wild-type (WT) or B7-/-B7h-/- (TKO) APC with a control rat IgG or a blocking antibody to B7S1 (S1) or B7H3 (H3) or PD1. IL-2 production was measured by ELISA 24 hrs after activation. Proliferation was assayed 3 days after treatment by adding [<sup>3</sup>H]-thymidine to the culture for the last 8 hours.
