# Supplementary material
Source: PubMed Central journal article supplement (PMC1478197)
Supplement: 7601146s8.pdf [file 7601146s8.pdf]

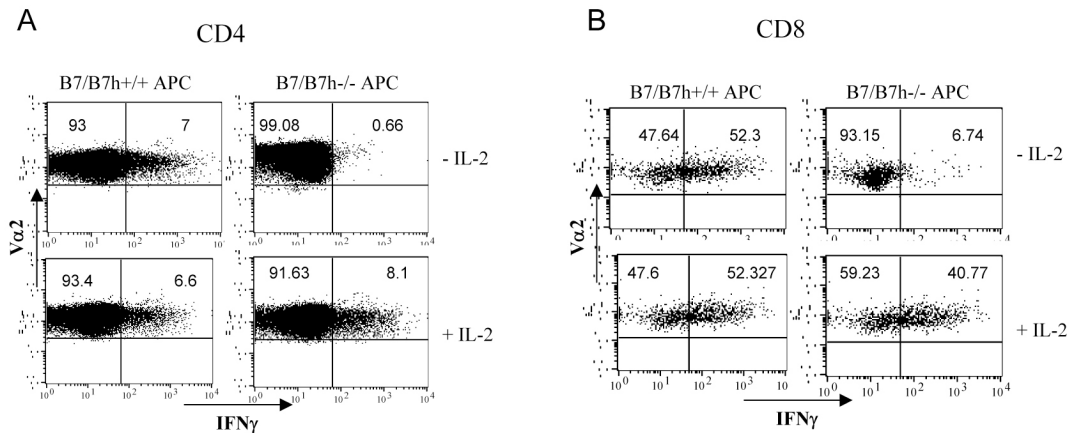

**Supplementary Figure 7.** IL-2 restores T cell function in the absence of CD28 and ICOS signaling. CD4 OT-II cells (A) or CD8 OT-I cells (B) were treated with Ova peptide or SIINFEKL peptide, respectively, in the presence of irradiated wild-type or B7<sup>-/-</sup>-B7h<sup>-/-</sup> APC with or without IL-2. After 4 or 7 days, T cells were restimulated with PMA/Ionomycin for 5 hrs. Intracellular staining of IFN $\gamma$  was performed, and then analyzed on gated V $\alpha$ 2<sup>+</sup> T cells by FACS.
