# Supplementary material
Source: PubMed Central journal article supplement (PMC1478197)
Supplement: 7601146s9.pdf [file 7601146s9.pdf]

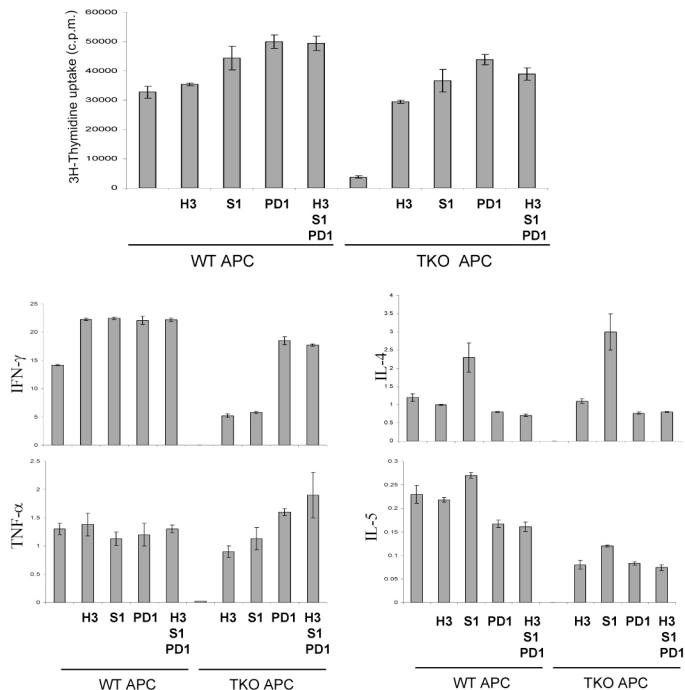

**Supplementary Figure 8.** Regulation of CD4 T cell tolerance by negative costimulatory molecules. OT-II cells were treated with Ova peptide in the presence of irradiated wild-type (WT) or B7<sup>-/-</sup>B7h<sup>-/-</sup> (TKO) APC with a control rat IgG or a blocking antibody to B7S1 (S1) or B7H3 (H3) or PD1 or combination of S1, H3 and PD1 antibodies. 4 days after activation, T cells were restimulated with plate-bound anti-CD3 for 24 hrs. Proliferation was assayed 24 hours after treatment by adding [<sup>3</sup>H]-thymidine to the culture for the last 8 hours. Effector cytokine production was measured by ELISA with all parameters indicated in Y-axis at ng/ml.
